# Supplementary material for: Discriminating sensing of explosive molecules using graphene–boron nitride–graphene heteronanosheets
Source: Royal Society of Chemistry journal article supplement (doi:10.1039/d2ra06125b), 2022-01-01
Supplement: d2ra06125b1.pdf [file d2ra06125b1.pdf]

## Supplementary Information

### Discriminating sensing of explosive molecules using graphene-boron nitride-graphene heteronanosheets

Laith A. Algharagholy<sup>1\*</sup>, Qusiy H. Al-Galiby<sup>2\*</sup>, Amaal A. Al-Backri<sup>3</sup>, Hatef Sadeghi<sup>4</sup> and Ahmed A. Wabdan<sup>5</sup>

<sup>1</sup>Department of Physics, College of Science, University of Sumer, Al Rifae, Thi Qar, Iraq.

<sup>2</sup>Physics Department, College of Education, University of Al-Qadisiyah, Diwaniyah, Iraq.

<sup>3</sup>Department of Astronomy and space, College of Science, University of Baghdad, Baghdad, Iraq.

<sup>4</sup>Device Modelling Group, School of Engineering, University of Warwick, Coventry CV4 7AL, UK.

<sup>5</sup>Department of Science, College of Basic Education, University of Sumer, Al Rifae, Thi Qar, Iraq.

\*Corresponding Authors: l.algharagholy@gmail.com and qusiy.algaliby@qu.edu.iq

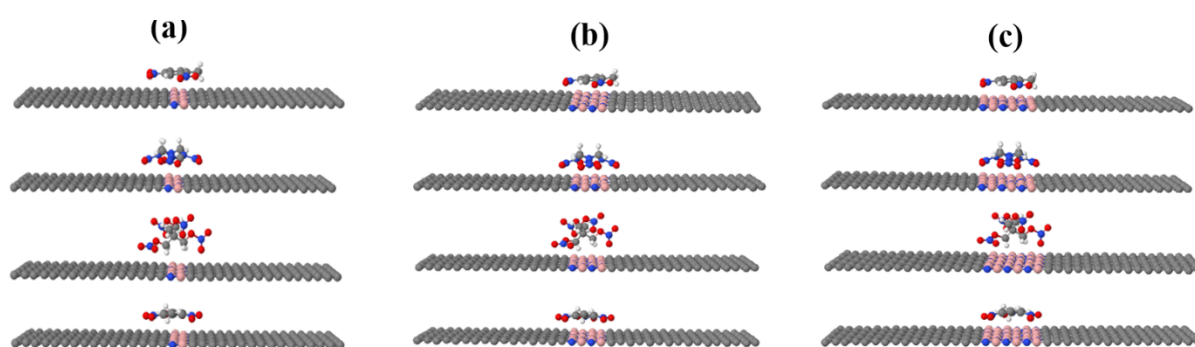

**Figure S1:** Shows the relaxed *h*-NSHs **(a)** with 1BN after place the DNT, HMX, PENT, and TNT molecules on the 1BN scatterer. **(b)** with 2BN after place the DNT, HMX, PENT, and TNT molecules on the 2BN scatterer. **(c)** with 3BN after place the DNT, HMX, PENT, and TNT molecules on the 3BN scatterer.

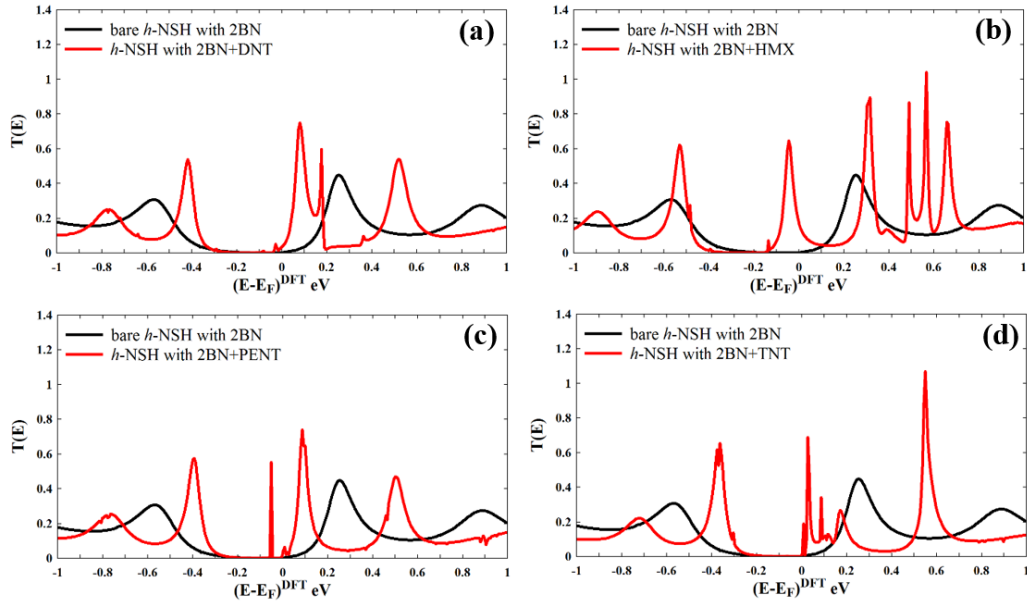

**Figure S2:** Shows the  $T(E)$  of the relaxed (a)  $h$ -NSH with 2BN+DNT, (b)  $h$ -NSH with 2BN+HMX, (c)  $h$ -NSH with 2BN+PENT, (d)  $h$ -NSH with 2BN+TNT. In all figures, the Fermi energy ( $E_F$ ) is shifted at zero.

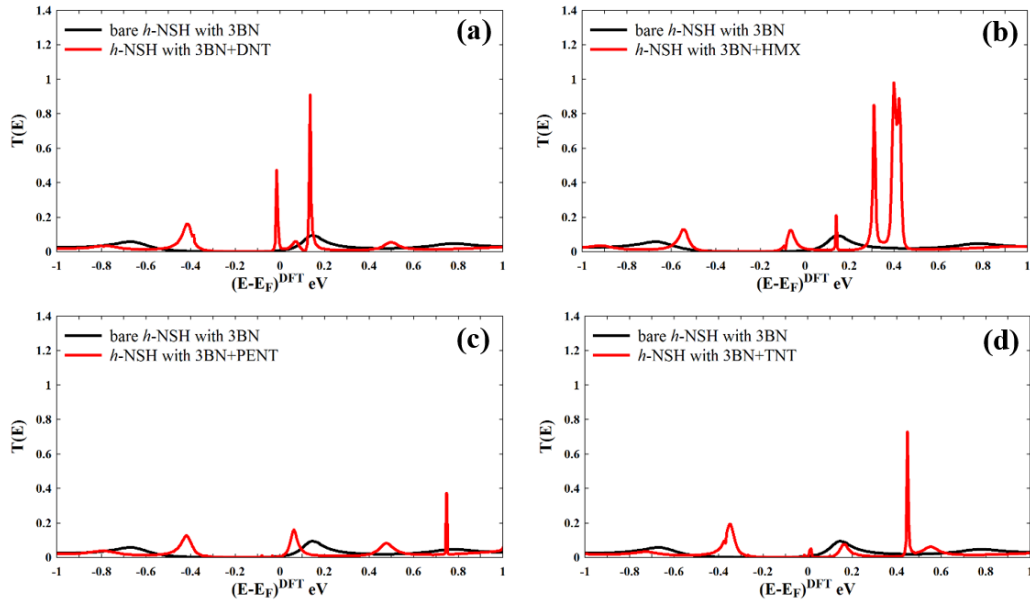

**Figure S3:** Shows the  $T(E)$  of the relaxed (a)  $h$ -NSH with 3BN+DNT, (b)  $h$ -NSH with 3BN+HMX, (c)  $h$ -NSH with 3BN+PENT, (d)  $h$ -NSH with 3BN+TNT. In all figures, the Fermi energy ( $E_F$ ) is shifted at zero.

**Table S1:** Shows the values of the Seebeck coefficient of the  $h$ -NSHs with 1BN/2BN/3BN junctions before and after place the molecules.

| $h$ -NSH with 1BN | S ( $\mu V/K$ ) | $h$ -NSH with 2BN | S ( $\mu V/K$ ) | $h$ -NSH with 3BN | S ( $\mu V/K$ ) |
|-------------------|-----------------|-------------------|-----------------|-------------------|-----------------|
| bare              | -185            | bare              | +39             | bare              | +138            |
| +DNT              | -242            | +DNT              | -175            | +DNT              | -24             |
| +HMX              | -96             | +HMX              | +72             | +HMX              | +83             |
| +PENT             | -278            | +PENT             | -146            | +PENT             | -176            |
| +TNT              | -214            | +TNT              | -113            | +TNT              | -73             |

To estimate the amount of charge transfer (CT), we performed the Mulliken charge analyses between the molecules and the  $h$ -NSH with 1BN/2BN/3BN as shown in table S2.

**Table S2:** The charge transfer (CT) between the  $h$ -NSH with 1BN/2BN/3BN and molecules (DNT, HMX, PENT and TNT), charge transfers are in electron per molecule.

| Junction          | CT                 |             |             |             |
|-------------------|--------------------|-------------|-------------|-------------|
|                   | +DNT               | +HMX        | +PENT       | +TNT        |
| $h$ -NSH with 1BN | + 0.110 $e$        | + 0.130 $e$ | + 0.120 $e$ | + 0.160 $e$ |
| $h$ -NSH with 2BN | + 0.180 $e$        | + 0.210 $e$ | + 0.110 $e$ | + 0.140 $e$ |
| $h$ -NSH with 3BN | + <b>0.260</b> $e$ | + 0.210 $e$ | + 0.130 $e$ | + 0.203 $e$ |

Looking at the table S2, we can note that the obtained results show that the charge transfer is larger in  $h$ -NSH with 3BN+DNT compared to the  $h$ -NSH with 1BN, and  $h$ -NSH with 2BN. The positive sign means that the charge transferred from the  $h$ -NSH+1BN/2BN/3BN to the molecule [12, 62].
